# Supplementary material
Source: PubMed Central journal article supplement (PMC2852880)
Supplement: NIHMS170722-supplement-1_si_001.pdf [file NIHMS170722-supplement-1_si_001.pdf]

|                     |                    |             |                   |                      |             |                                         |
|---------------------|--------------------|-------------|-------------------|----------------------|-------------|-----------------------------------------|
|                     | 10                 | 20          | 30                | 40                   | 50          | 60                                      |
|                     |                    |             |                   |                      |             |                                         |
| <i>P.a.BfrB</i>     | MKGD               | KVIQHLN     | KNKILGN <b>EL</b> | IAINQYFLHS           | RMWWDWGLKRL | GAHEYHESID <b>EMKH</b> HADKLI <b>E</b>  |
| <i>A.vinelandii</i> | MKGD               | KVIQHLN     | KNKILGN <b>EL</b> | IAINQYFLHARM         | YEDWGLEKLGK | HEYHESID <b>EMKH</b> HADKLIK            |
| <i>E. coli</i>      | MKGD               | TKVINYL     | NKLLGN <b>EL</b>  | VAINQYFLHARM         | FKNWGLKRLND | VEYHESID <b>EMKH</b> HADRYIE            |
| <i>M.smegmatis</i>  | MQGD               | PDVLLKLL    | NEQLT <b>SE</b>   | LTAINQYFLH           | SKMQDNWGFTE | LAEHTRAESFE <b>EMR</b> H <b>A</b> ETITD |
| <i>R.capsulatus</i> | MKGD               | AKVIEFL     | NAALRS <b>EL</b>  | TAISQYWVH            | FRLQEDWGLAK | MAKKSREESIE <b>EMG</b> HADKIIA          |
|                     |                    |             |                   |                      |             |                                         |
|                     | 70                 | 80          | 90                | 100                  | 110         | 120                                     |
|                     |                    |             |                   |                      |             |                                         |
| <i>P.a.BfrB</i>     | RILF               | LEGLPNLQDL  | GKLLIGENTQ        | EMLQCDLNL <b>EL</b>  | KATKDLREAI  | VHCEQVHDYVSRDLL                         |
| <i>A.vinelandii</i> | RILF               | LEGLPNLQEL  | GKLLIGEHTK        | EMLECDLKL <b>EQ</b>  | AGLPDLKAAI  | AYCESVGDYASRELL                         |
| <i>E. coli</i>      | RILF               | LEGLPNLQDL  | GKLNIGEDV         | EEMLRSDLAL <b>EL</b> | DGAKNLREAI  | GYADSVHDYVSRDMM                         |
| <i>M.smegmatis</i>  | RILLL              | DGLPNYQRLF  | SLRVGQTLRE        | QFEADLAI <b>EY</b>   | EVLERLKP    | GIVLCREKQDATSARLL                       |
| <i>R.capsulatus</i> | RILF               | LEGHPNLQKLD | PLRIGEGPRE        | TLECDLAGE <b>EH</b>  | DALKLYREAR  | DYCAEVGDIVSKNIF                         |
|                     |                    |             |                   |                      |             |                                         |
|                     | 130                | 140         | 150               |                      |             |                                         |
|                     |                    |             |                   |                      |             |                                         |
| <i>P.a.BfrB</i>     | KDILE <b>SEEEH</b> | IDYLETQLGLI | QKVGLENYLQ        | SHMHEDD---           |             |                                         |
| <i>A.vinelandii</i> | EDILE <b>SEEDH</b> | IDWLETQLDL  | IDKIGLENYLQ       | SQMDE----            |             |                                         |
| <i>E. coli</i>      | IEILRD <b>EEGH</b> | IDWLETEL    | DLIQKMGLQNYL      | QAQIREEG---          |             |                                         |
| <i>M.smegmatis</i>  | EQILAD <b>EETH</b> | IDYLETQLQL  | MDKLGDALYAA       | QCVSPPGSA            |             |                                         |
| <i>R.capsulatus</i> | ESLITD <b>EEGH</b> | VDFLETQISL  | YDRLGPGQF         | FALLNAAPMDAAE        |             |                                         |

**Figure S1.** Bacterioferritin sequences from different organisms aligned against *P. aeruginosa* BfrB (Pa BfrB): Residues involved in the ferroxidase center, as well as Met-52, which coordinates the heme axially, are highlighted. The sequences were aligned with the aid of ClustalW

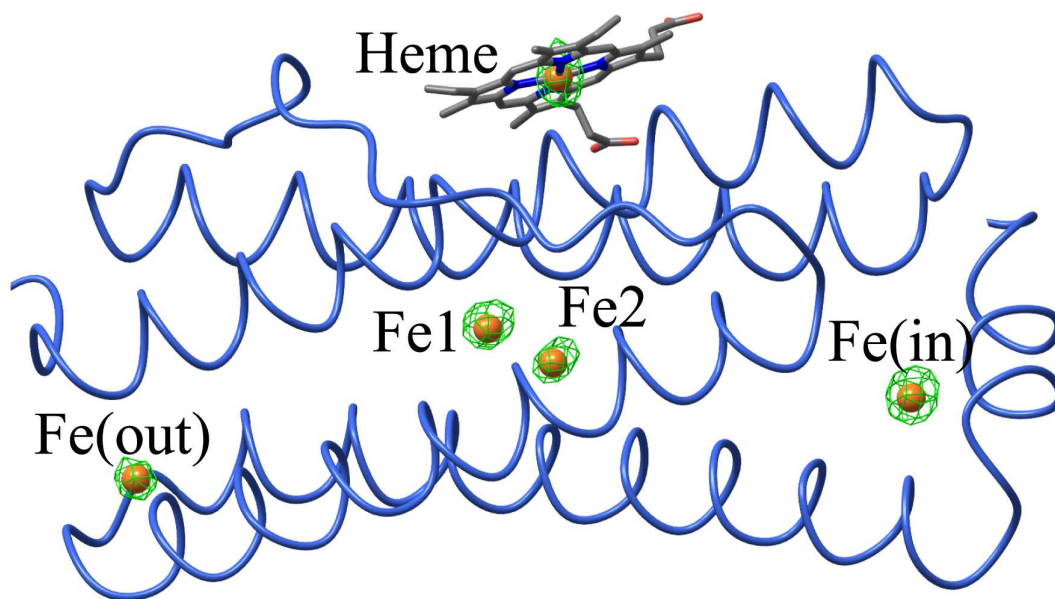

**Figure S2.** Single subunit of BfrB showing the anomalous difference map (green mesh) calculated from data collected at  $\lambda = 1.6314 \text{ \AA}$  contoured at  $6\sigma$ . Fe atoms are represented as gold spheres and the neighboring heme atoms are drawn as sticks.

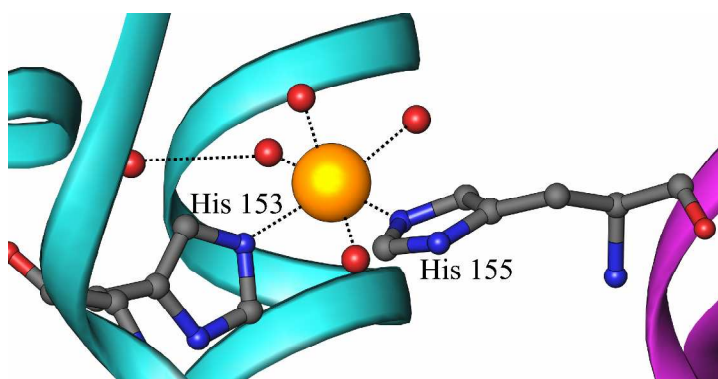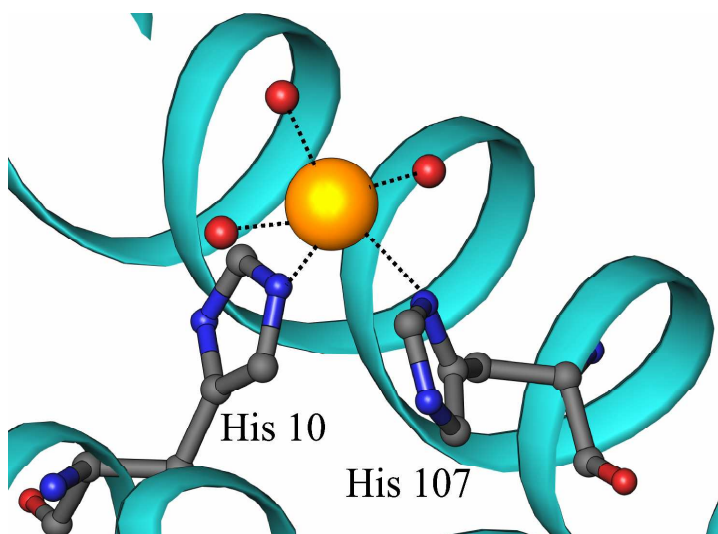

**Figure S3.** Non-bonded contacts between Fe ions and histidine residues. Fe ions and water molecules are represented as gold and red spheres, respectively. (A) Fe<sub>in</sub> and His 153 from subunit J and His 155 from subunit E. (B) Fe<sub>out</sub> and surface residues His 10 and His 107.
